# Supplementary material
Source: PubMed Central journal article supplement (PMC4959953)
Supplement: BPH-173-2490-s002.pdf [file BPH-173-2490-s002.pdf]

**Table 1. Details of the rat primers used for quantitative real-time PCR of each gene**

|                         | Gene                               | Name                                | GenBank accession no. | Direction            | Primer Sequence (5'-3') | Amplicon Length (nt) |
|-------------------------|------------------------------------|-------------------------------------|-----------------------|----------------------|-------------------------|----------------------|
| <b>Internal control</b> | <i>18S</i>                         | <i>Rat 18S ribosomal RNA</i>        | NR_046237             | Left                 | GGAGCCTGAGAAACGGCTA     | 64                   |
|                         |                                    |                                     |                       | Right                | TCGGGAGTGGGTAATTTGC     |                      |
| <b>Class I</b>          | <i>Hdac1</i>                       | <i>Histone deacetylase 1, mRNA</i>  | NM_001025409          | Left                 | GATCGGCTAGGTTGCTTCAA    | 131                  |
|                         |                                    |                                     |                       | Right                | CAGCACCGAGCGACATTAC     |                      |
|                         | <i>Hdac2</i>                       | <i>Histone deacetylase 2, mRNA</i>  | NM_053447             | Left                 | GCTGTCCTCGAGCTACTGAAA   | 110                  |
|                         |                                    |                                     |                       | Right                | GTCATCACGCGATCTGTTGT    |                      |
|                         | <i>Hdac3</i>                       | <i>Histone deacetylase 3, mRNA</i>  | NM_053448             | Left                 | ATGCTGAAGAGAGGGGTCCT    | 64                   |
|                         |                                    |                                     |                       | Right                | TCATAGAATTCATTGGGTGCTTC |                      |
|                         | <i>Hdac8</i>                       | <i>Histone deacetylase 8, mRNA</i>  | NM_001126373          | Left                 | TGCCCTGCATAAACAATGA     | 83                   |
|                         |                                    |                                     |                       | Right                | GATAGGCATCAGTGTGGAAGG   |                      |
| <b>Class II A</b>       | <i>Hdac4</i>                       | <i>Histone deacetylase 4, mRNA</i>  | NM_053449             | Left                 | ATCACCATCCTTGCCCAAC     | 96                   |
|                         |                                    |                                     |                       | Right                | GGGAGAGCAAGCCTCTCAG     |                      |
|                         | <i>Hdac5</i>                       | <i>Histone deacetylase 5, mRNA</i>  | NM_053450             | Left                 | GGTCGTAAAGCCCACTGGA     | 95                   |
|                         |                                    |                                     |                       | Right                | TCCAGCTTCTGCCGGTTAAG    |                      |
|                         | <i>Hdac7</i>                       | <i>Histone deacetylase 7, mRNA</i>  | XM_006226246          | Left                 | AGCCCCAGTATCCCCTACAG    | 117                  |
|                         |                                    |                                     |                       | Right                | ATGTTCCGGGGGTTTCAGT     |                      |
| <i>Hdac9</i>            | <i>Histone deacetylase 9, mRNA</i> | NM_001200045                        | Left                  | TGCCCTTCTAGGAAATGAGC | 76                      |                      |
|                         |                                    |                                     | Right                 | AGCGGCTGCATTTCGTATT  |                         |                      |
| <b>Class II B</b>       | <i>Hdac6</i>                       | <i>Histone deacetylase 6, mRNA</i>  | XM_003754740          | Left                 | CAGACCACAGGAGCTTCACC    | 112                  |
|                         |                                    |                                     |                       | Right                | CGGATTCTTGGACTTCCTGA    |                      |
|                         | <i>Hdac10</i>                      | <i>Histone deacetylase 10, mRNA</i> | NM_001035000          | Left                 | AGCGATGTGTAGCCCATAGAG   | 75                   |
|                         |                                    |                                     | Right                 | ACCAGATGTCTGCCTCCTTG |                         |                      |
| <b>Class IV</b>         | <i>Hdac11</i>                      | <i>Histone deacetylase 11, mRNA</i> | NM_001106610          | Left                 | ACGTCCTGGAGGGAGACC      | 69                   |
|                         |                                    |                                     | Right                 | CTTCATCCCTCTTCAATGC  |                         |                      |
