# Supplementary material
Source: PubMed Central journal article supplement (PMC4959953)

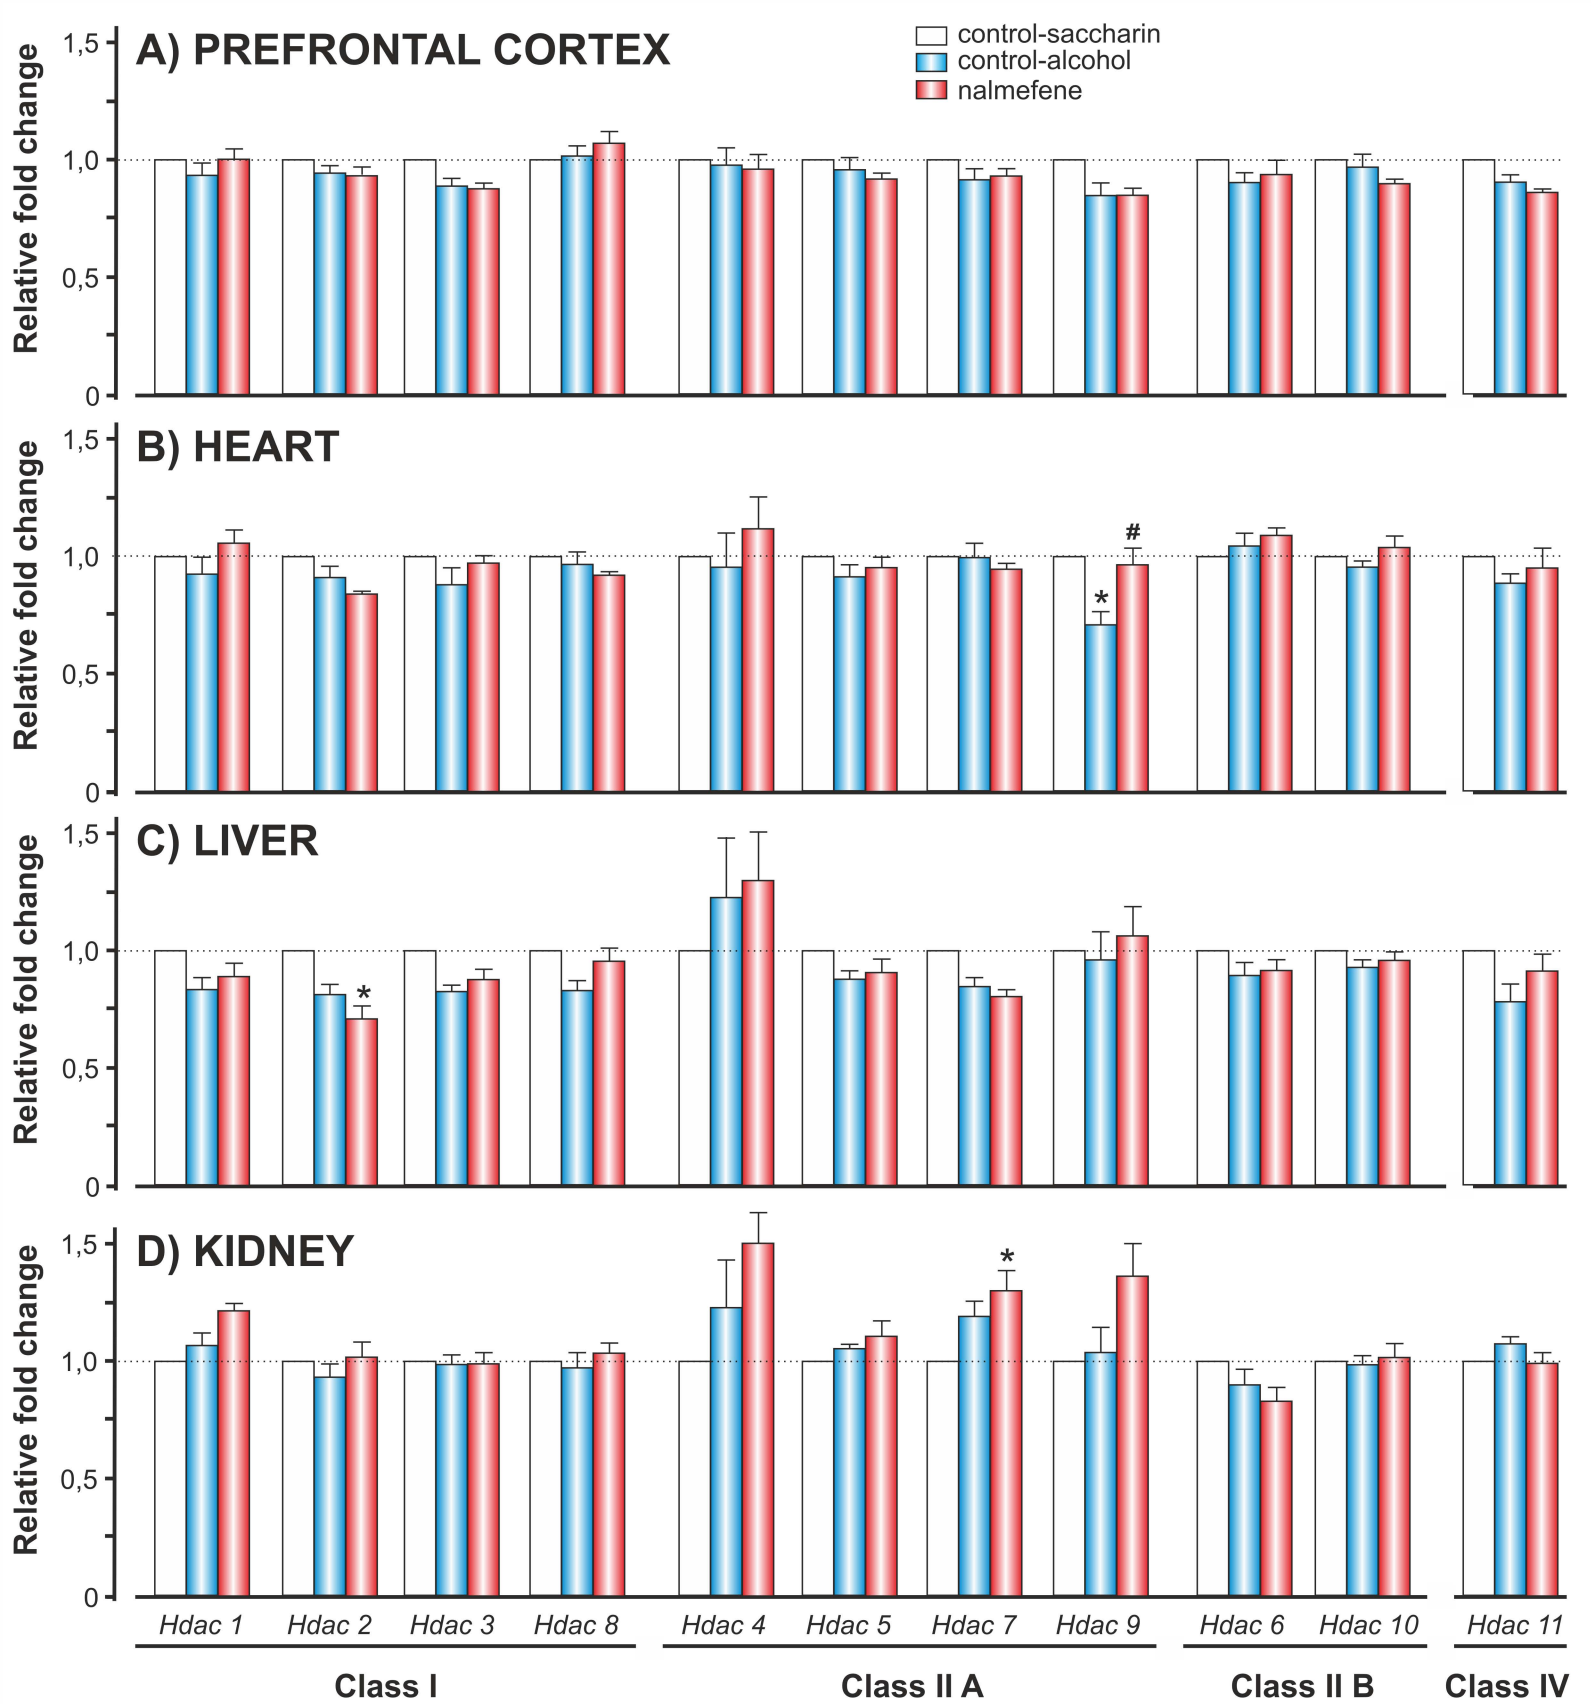

Supplement: BPH-173-2490-s001.pdf [file BPH-173-2490-s001.pdf]
